# Supplementary material for: Determinants of cigarette/bidi smoking among youth male in rural Mymensingh of Bangladesh: A cross-sectional study
Source: PubMed Central journal article supplement (PMC7769457; doi:10.1371/journal.pone.0244335), 2020-12-28
Supplement: pone.0244335.s004.pdf [file pone.0244335.s004.pdf]

# PLOS ONE

## Determinants of cigarette/ bidi smoking among youth male in rural Mymensingh of Bangladesh: A cross-sectional study

--Manuscript Draft--

|                                |                                                                                                                                                                                                                                                                                                                                                                                                                                                                                                                                                                                                                                                                                                                                                                                                                                                                                                                                                                                                                                                                                                                                                                                                                                                                                                                                                                                                                                                                                                                                                                                                                                                                                                                                                                                                                                                                                                                                                                                                                                                                                                                                                                                             |
|--------------------------------|---------------------------------------------------------------------------------------------------------------------------------------------------------------------------------------------------------------------------------------------------------------------------------------------------------------------------------------------------------------------------------------------------------------------------------------------------------------------------------------------------------------------------------------------------------------------------------------------------------------------------------------------------------------------------------------------------------------------------------------------------------------------------------------------------------------------------------------------------------------------------------------------------------------------------------------------------------------------------------------------------------------------------------------------------------------------------------------------------------------------------------------------------------------------------------------------------------------------------------------------------------------------------------------------------------------------------------------------------------------------------------------------------------------------------------------------------------------------------------------------------------------------------------------------------------------------------------------------------------------------------------------------------------------------------------------------------------------------------------------------------------------------------------------------------------------------------------------------------------------------------------------------------------------------------------------------------------------------------------------------------------------------------------------------------------------------------------------------------------------------------------------------------------------------------------------------|
| <b>Manuscript Number:</b>      | PONE-D-20-25908                                                                                                                                                                                                                                                                                                                                                                                                                                                                                                                                                                                                                                                                                                                                                                                                                                                                                                                                                                                                                                                                                                                                                                                                                                                                                                                                                                                                                                                                                                                                                                                                                                                                                                                                                                                                                                                                                                                                                                                                                                                                                                                                                                             |
| <b>Article Type:</b>           | Research Article                                                                                                                                                                                                                                                                                                                                                                                                                                                                                                                                                                                                                                                                                                                                                                                                                                                                                                                                                                                                                                                                                                                                                                                                                                                                                                                                                                                                                                                                                                                                                                                                                                                                                                                                                                                                                                                                                                                                                                                                                                                                                                                                                                            |
| <b>Full Title:</b>             | Determinants of cigarette/ bidi smoking among youth male in rural Mymensingh of Bangladesh: A cross-sectional study                                                                                                                                                                                                                                                                                                                                                                                                                                                                                                                                                                                                                                                                                                                                                                                                                                                                                                                                                                                                                                                                                                                                                                                                                                                                                                                                                                                                                                                                                                                                                                                                                                                                                                                                                                                                                                                                                                                                                                                                                                                                         |
| <b>Short Title:</b>            | Determinants of smoking among youth male in Bangladesh                                                                                                                                                                                                                                                                                                                                                                                                                                                                                                                                                                                                                                                                                                                                                                                                                                                                                                                                                                                                                                                                                                                                                                                                                                                                                                                                                                                                                                                                                                                                                                                                                                                                                                                                                                                                                                                                                                                                                                                                                                                                                                                                      |
| <b>Corresponding Author:</b>   | Md. Ismail Tareque, Ph.D.<br>University of Rajshahi<br>Rajshahi, BANGLADESH                                                                                                                                                                                                                                                                                                                                                                                                                                                                                                                                                                                                                                                                                                                                                                                                                                                                                                                                                                                                                                                                                                                                                                                                                                                                                                                                                                                                                                                                                                                                                                                                                                                                                                                                                                                                                                                                                                                                                                                                                                                                                                                 |
| <b>Keywords:</b>               | Smoking; youth; rural; determinants; Bangladesh                                                                                                                                                                                                                                                                                                                                                                                                                                                                                                                                                                                                                                                                                                                                                                                                                                                                                                                                                                                                                                                                                                                                                                                                                                                                                                                                                                                                                                                                                                                                                                                                                                                                                                                                                                                                                                                                                                                                                                                                                                                                                                                                             |
| <b>Abstract:</b>               | <p><b>Background</b></p> <p>Smoking cigarette/ bidi, is a serious health threat, causes preventable premature morbidity and mortality. Higher prevalence of smoking among the youth hampers a country's development, as the youth are the main drives of socio-economic development. An effective understanding of factors associated with youth smoking is precious to prevent youth smoking. This study aims to identify the determinants of smoking cigarette/bidi among the youth male of the rural areas of Mymensingh district in Bangladesh.</p> <p><b>Methods</b></p> <p>Data came from a secondary source. A total of 385 youth male aged 15-24 years were interviewed face-to-face from the rural areas of Mymensingh district in Bangladesh. Univariate distribution, chi-square tests, and binary logistic regression model were employed to identify the factors associated with smoking cigarette/bidi among the youth male.</p> <p><b>Results</b></p> <p>The prevalence of smoking cigarette/bidi among the youth male is 40.3%. Age, occupation, monthly income, family's monthly income, cigarette/ bidi smoking status of father, brother and close friends, and knowledge about harmfulness of smoking are revealed as the determinants of cigarette/ bidi smoking. For instance, the odds of being smoker for those aged 18-20 years is 1.78 times [95% CI: 0.77-4.11], and for those aged 21-24 years is 5.54 times [2.25-13.61] than those aged 15-17 years. Business owner is less likely (Odds Ratio [OR]: 0.15 [0.03-0.69]) to smoke than the day labourer. Having smoker fathers (OR: 2.24 [1.25-3.98]), smoker brothers (OR: 3.03 [1.46-6.29]), smoker friends (OR: 10.65 [5.89-19.25]) are significantly associated with smoking cigarette/ bidi.</p> <p><b>Conclusion</b></p> <p>As the first study, it provides the determinants of cigarette/ bidi smoking among youth male of the rural areas of Mymensingh district in Bangladesh. Relevant authorities are suggested to consider the study's findings and recommendations to revise the existing smoking policies so that smoking among youth can be prevented for future development of the country.</p> |
| <b>Order of Authors:</b>       | K. M. Mustafizur Rahman<br>Md. Ismail Tareque, Ph.D.                                                                                                                                                                                                                                                                                                                                                                                                                                                                                                                                                                                                                                                                                                                                                                                                                                                                                                                                                                                                                                                                                                                                                                                                                                                                                                                                                                                                                                                                                                                                                                                                                                                                                                                                                                                                                                                                                                                                                                                                                                                                                                                                        |
| <b>Additional Information:</b> |                                                                                                                                                                                                                                                                                                                                                                                                                                                                                                                                                                                                                                                                                                                                                                                                                                                                                                                                                                                                                                                                                                                                                                                                                                                                                                                                                                                                                                                                                                                                                                                                                                                                                                                                                                                                                                                                                                                                                                                                                                                                                                                                                                                             |
| <b>Question</b>                | <b>Response</b>                                                                                                                                                                                                                                                                                                                                                                                                                                                                                                                                                                                                                                                                                                                                                                                                                                                                                                                                                                                                                                                                                                                                                                                                                                                                                                                                                                                                                                                                                                                                                                                                                                                                                                                                                                                                                                                                                                                                                                                                                                                                                                                                                                             |

## Financial Disclosure

Enter a financial disclosure statement that describes the sources of funding for the work included in this submission. Review the [submission guidelines](#) for detailed requirements. View published research articles from [PLOS ONE](#) for specific examples.

This statement is required for submission and **will appear in the published article** if the submission is accepted. Please make sure it is accurate.

### Unfunded studies

Enter: *The author(s) received no specific funding for this work.*

### Funded studies

Enter a statement with the following details:

- Initials of the authors who received each award
- Grant numbers awarded to each author
- The full name of each funder
- URL of each funder website
- Did the sponsors or funders play any role in the study design, data collection and analysis, decision to publish, or preparation of the manuscript?
- **NO** - Include this sentence at the end of your statement: *The funders had no role in study design, data collection and analysis, decision to publish, or preparation of the manuscript.*
- **YES** - Specify the role(s) played.

\* typeset

The author(s) received no specific funding for this work.

## Competing Interests

Use the instructions below to enter a competing interest statement for this submission. On behalf of all authors, disclose any [competing interests](#) that could be perceived to bias this work—acknowledging all financial support and any other relevant financial or non-financial competing interests.

This statement **will appear in the published article** if the submission is accepted. Please make sure it is

The authors have declared that no competing interests exist.

accurate. View published research articles from [PLOS ONE](#) for specific examples.

#### NO authors have competing interests

Enter: *The authors have declared that no competing interests exist.*

#### Authors with competing interests

Enter competing interest details beginning with this statement:

*I have read the journal's policy and the authors of this manuscript have the following competing interests: [insert competing interests here]*

\* typeset

#### Ethics Statement

Enter an ethics statement for this submission. This statement is required if the study involved:

- Human participants
- Human specimens or tissue
- Vertebrate animals or cephalopods
- Vertebrate embryos or tissues
- Field research

Write "N/A" if the submission does not require an ethics statement.

General guidance is provided below. Consult the [submission guidelines](#) for detailed instructions. **Make sure that all information entered here is included in the Methods section of the manuscript.**

The study design and funding for the project titled "Knowledge, awareness and practices among youth smokers in Trishal Upazila under Mymensingh district: A micro-survey study" were approved by the Research and Extension Center, Jatiya Kabi Kazi Nazrul Islam University, Bangladesh. All respondents were asked to provide verbal consent after being read a document emphasizing voluntary participation in the project. Any identifying information was removed. As the de-identified data for this study came from secondary source, this study does not require ethical approval.

**Format for specific study types**

**Human Subject Research (involving human participants and/or tissue)**

- Give the name of the institutional review board or ethics committee that approved the study
- Include the approval number and/or a statement indicating approval of this research
- Indicate the form of consent obtained (written/oral) or the reason that consent was not obtained (e.g. the data were analyzed anonymously)

**Animal Research (involving vertebrate animals, embryos or tissues)**

- Provide the name of the Institutional Animal Care and Use Committee (IACUC) or other relevant ethics board that reviewed the study protocol, and indicate whether they approved this research or granted a formal waiver of ethical approval
- Include an approval number if one was obtained
- If the study involved *non-human primates*, add *additional details* about animal welfare and steps taken to ameliorate suffering
- If anesthesia, euthanasia, or any kind of animal sacrifice is part of the study, include briefly which substances and/or methods were applied

**Field Research**

Include the following details if this study involves the collection of plant, animal, or other materials from a natural setting:

- Field permit number
- Name of the institution or relevant body that granted permission

**Data Availability**

Authors are required to make all data underlying the findings described fully available, without restriction, and from the time of publication. PLOS allows rare exceptions to address legal and ethical concerns. See the [PLOS Data Policy](#) and [FAQ](#) for detailed information.

Yes - all data are fully available without restriction

A Data Availability Statement describing where the data can be found is required at submission. Your answers to this question constitute the Data Availability Statement and **will be published in the article**, if accepted.

**Important:** Stating 'data available on request from the author' is not sufficient. If your data are only available upon request, select 'No' for the first question and explain your exceptional situation in the text box.

Do the authors confirm that all data underlying the findings described in their manuscript are fully available without restriction?

**Describe where the data may be found in full sentences. If you are copying our sample text, replace any instances of XXX with the appropriate details.**

- If the data are **held or will be held in a public repository**, include URLs, accession numbers or DOIs. If this information will only be available after acceptance, indicate this by ticking the box below. For example: *All XXX files are available from the XXX database (accession number(s) XXX, XXX).*
- If the data are all contained **within the manuscript and/or Supporting Information files**, enter the following: *All relevant data are within the manuscript and its Supporting Information files.*
- If neither of these applies but you are able to provide **details of access elsewhere**, with or without limitations, please do so. For example:

*Data cannot be shared publicly because of [XXX]. Data are available from the XXX Institutional Data Access / Ethics Committee (contact via XXX) for researchers who meet the criteria for access to confidential data.*

*The data underlying the results presented in the study are available from (include the name of the third party*

The data will be made available only after acceptance of the manuscript. The data will be shared through email.

*and contact information or URL).*

- This text is appropriate if the data are owned by a third party and authors do not have permission to share the data.

\* typeset

Additional data availability information:

1 **Determinants of cigarette/ bidi smoking among youth male in rural**

2 **Mymensingh of Bangladesh: A cross-sectional study**

3

4

5 K. M. Mustafizur Rahman <sup>1</sup>, Md. Ismail Tareque <sup>2\*</sup>

6

7

8 <sup>1</sup> Department of Population Science, Jatiya Kabi Kazi Nazrul Islam University, Trishal-2220,

9 Mymensingh, Bangladesh

10 <sup>2</sup> Department of Population Science and Human Resource Development, University of

11 Rajshahi, Rajshahi 6205, Bangladesh

12

13

14 E-mail

15 K. M. Mustafizur Rahman: nishan\_hrd@yahoo.com

16 Md. Ismail Tareque: tarequemi\_pops@ru.ac.bd

17 ORCID ID

18 K. M. Mustafizur Rahman: 0000-0002-3817-9048

19 Md. Ismail Tareque: 0000-0002-6507-1171

20

21

22 \* Corresponding author

23 Email: tarequemi\_pops@ru.ac.bd (MIT)

24 tareque\_pshd@yahoo.com (MIT)

25

## 26 **Abstract**

### 27 **Background**

28 Smoking cigarette/ bidi, is a serious health threat, causes preventable premature morbidity  
29 and mortality. Higher prevalence of smoking among the youth hampers a country's  
30 development, as the youth are the main **drives** of socio-economic development. An effective  
31 understanding of factors associated with youth smoking is precious to prevent youth  
32 smoking. This study aims to identify the determinants of smoking cigarette/bidi among the  
33 youth male of the rural areas of Mymensingh district in Bangladesh.

### 34 **Methods**

35 Data came from a secondary source. A total of 385 youth male aged 15-24 years were  
36 interviewed face-to-face from the rural areas of Mymensingh district in Bangladesh.  
37 Univariate distribution, chi-square tests, and binary logistic regression model were employed  
38 to identify the factors associated with smoking cigarette/bidi among the youth male.

### 39 **Results**

40 The prevalence of smoking cigarette/bidi among the youth male is 40.3%. Age, occupation,  
41 monthly income, family's monthly income, cigarette/ bidi smoking status of father, brother  
42 and close friends, and knowledge about harmfulness of smoking are revealed as the  
43 determinants of cigarette/ bidi smoking. For instance, the odds of being smoker for those  
44 aged 18-20 years is 1.78 times [95% CI: 0.77-4.11], and for those aged 21-24 years is 5.54  
45 times [2.25-13.61] than those aged 15-17 years. Business owner is less likely (Odds Ratio  
46 [OR]: 0.15 [0.03-0.69]) to smoke than the day labourer. Having smoker fathers (OR: 2.24  
47 [1.25-3.98]), smoker brothers (OR: 3.03 [1.46-6.29]), smoker friends (OR: 10.65 [5.89-  
48 19.25]) are significantly associated with smoking cigarette/ bidi.

### 49 **Conclusion**



50 As the first study, it provides the determinants of cigarette/ bidi smoking among youth male  
51 of the rural areas of Mymensingh district in Bangladesh. Relevant authorities are suggested to  
52 consider the study's findings and recommendations to revise the existing smoking policies so  
53 that smoking among youth can be prevented for future development of the country.

54

## 55 **Key words**

56 Smoking; youth; rural; determinants; Bangladesh.

57

58

59

## 60 Introduction

61 Tobacco use is a significant public health concern. Globally, more than 7 million  
62 people die due to direct tobacco use, and around 1.2 million non-smokers die due to being  
63 exposed to second-hand smoke [1]. All forms of tobacco are harmful, and there is no safe  
64 level of exposure to tobacco [1]. Cigarette/ bidi smoking is the most common form of tobacco  
65 use among men in Bangladesh, where 43% of adults use some form of tobacco, 45% of men  
66 and only 1.5% of women smoke cigarettes [2]. Despite having ban on the sales of tobacco to  
67 and by minors, particularly those aged <18 years, in Bangladesh national tobacco control law,  
68 university male students are found to initiate smoking at an average age of 17.8 years [3].  
69 Evidences demonstrate that majority of the people try their first cigarette before the age of  
70 18 and become daily smokers in adolescents. For instance, most of the European start  
71 smoking before the age of 18 and often transit to regular smokers during young adulthood [4].  
72 In the United States, about 90% of all regular smokers begin smoking at or before age 18, and  
73 hardly any regular smoker tries the first cigarette outside of childhood [5,6]. When people  
74 start smoking at an earlier age, the duration of smoking must be longer for the people at  
75 adulthood. Due to the prolonged smoking, a wide range of diseases can accelerate the  
76 premature morbidity and mortality among the adults [7]. The longer duration of smoking  
77 creates more miserable conditions to their lives, families, societies and the country, especially  
78 for developing country like Bangladesh; because cigarette smoking harms almost every organ  
79 of human body, causes many diseases, and reduces the health of smokers in general [8].  
80 Therefore, it is imperative to study the factors that are associated with smoking, particularly  
81 among the youth, in Bangladesh. Identification of modifiable factors will provide the  
82 possibilities to prevent smoking among the youth.

83 Bangladesh has made a considerable progress in socio-economic and demographic  
84 indicators over the last few decades [9]. And, the socio-economic and demographic indicators

85 are progressing in the right path to achieve the desired level of prospective socio-economic  
86 development in the country. However, the progress could stay behind the desired level due to  
87 the use of tobacco among the youth, as the use of tobacco has high impact on growing  
88 economy and high expenditure on health [10]. Bangladesh is passing through its golden  
89 opportunity of demographic dividend where youth remains **the central** to such development.  
90 Therefore, smoking among youth **is alarming issue** to be taken care of for the future  
91 development of the country.

92 According to the Global Adult Tobacco Survey, in Bangladesh, around 22 million  
93 people are smoking different types of tobacco products, among them 12% people aged 15-24  
94 years (considered youth in the current study; discussed in the Methods section) are  
95 consuming some form of tobacco [11]. The number of tobacco users, particularly among the  
96 youth, is increasing day by day due to availability of cheap tobacco products, poor status of  
97 tobacco control regulations, and weak enforcement of such regulations [3,12]. Youth is an  
98 important age group as healthy youth leads to healthy future. They are the main instruments  
99 for future development of the country. Higher incidence of smoking among the youth surely  
100 hampers the future development. Hence, it is indispensable to restrict the youth from  
101 smoking. In different settings, factors associated with cigarette smoking among the youth  
102 includes exposure to smokers (elders, parents, friends, teachers), availability of tobacco, low  
103 socio-economic status, low self-esteem, poor academic performances [13,14]. Although there  
104 are studies on the determinants of smoking around the world [15–20], there is a paucity of  
105 research to identify the factors responsible for smoking among the youth in Bangladesh. **In**  
106 **fact, the majority of the existing studies have been limited to the prevalence and predictors of**  
107 **tobacco use among the university students. It is essential to identify the determinants of youth**  
108 **smoking in Bangladesh.** Thus, the aim of this study is to identify the determinants of smoking  
109 among the youth in Bangladesh. It is believed that findings of the current study will be

110 helpful for Bangladeshi policy makers in formulating strong measures along with revising or  
111 redrawing the existing policies to discourage smoking among the youth in Bangladesh.

## 112 **Methods**

### 113 **Data**

114 We utilized secondary data for this study. The secondary data came from the project  
115 titled “Knowledge, awareness and practices among youth smokers in Trishal Upazila under  
116 Mymensingh district: A micro-survey study”, funded by the Research and Extension Center,  
117 Jatiya Kabi Kazi Nazrul Islam University, Bangladesh. In brief, the data for the project were  
118 collected from youth male aged 15-24 years (according to United Nations, individuals aged  
119 15-24 years are youth [21]) from the rural areas of Trishal Upazila of Mymensingh district of  
120 Bangladesh from November 25, 2019 to December 15, 2019. The upazila is about 20  
121 kilometers away from the divisional town of Mymensingh, and about 90 kilometers away  
122 from the capital city of Dhaka. The Upazila consists of 1 municipality and 12 unions. Using  
123 simple random sampling technique, at first one union (namely, Trishal Union) from Trishal  
124 Upazila, and then five wards (Ward 1, 2, 3, 8 and 9) from Trishal Union were selected.  
125 Finally, using systematic random sampling technique, data from 385 youth males were  
126 collected from the selected wards. Based on the total number of youth male in the selected  
127 wards, obtained from the Bangladesh Population and Housing Census 2011 [22], the data  
128 were collected, and during data collection one of every fifth male youth was interviewed in  
129 the selected wards. Consequently, 53 youth male from Ward 1, 81 from Ward 2, 74 from  
130 Ward 3, 91 from Ward 8, and 86 from Ward 9 were interviewed. A well-structured  
131 questionnaire with demographic and socio-economic questions was administered face-to-face  
132 to 385 youth males. From socio-cultural and religious points of view, smoking among female

133 are still beyond the consideration in Bangladesh. Therefore, only males were considered for  
134 the project.

### 135 **Outcome variable**

136 Current smoking status of the respondents (youth males aged 15-24 years) is  
137 considered as the outcome variable, which was dichotomized by assigning 1 if a respondent  
138 had been cigarette/ bidi smoking for last six months prior to the survey, and 0 for otherwise.

### 139 **Explanatory variables**

140 A wide range of individual and household characteristics, reported to be associated  
141 with smoking status among the youth in previous studies [20,23–27], were included in the  
142 current study. Individual's characteristics include respondent's current age (classified as 15-  
143 17, 18-20, or 21-24 years), education (categorized 0 to 5 years of schooling as below  
144 secondary, 6 to 10 years of schooling as secondary, or 11+ years of schooling as higher  
145 secondary and above), occupation (categorized as day labourer, service, business, students, or  
146 unemployed), monthly income (no income, <5000 Bangladesh currency Taka [BDT], or  
147  $\geq$ 5000 BDT), financial dependency on the family (classified as dependent or independent),  
148 knowledge about the risks of disease– whether smoking brings the risk of chronic disease (no  
149 or yes), and knowledge about the harmfulness– whether smoking is harmful to other non-  
150 smokers (no or yes). Household's characteristics include education of father (categorized as  
151 below secondary, secondary, or higher secondary and above), education of mother  
152 (categorized as below secondary, secondary, or higher secondary and above), family income  
153 (<15000 BDT, 15000-25000 BDT, or >25000 BDT), current smoking status of father (no or  
154 yes), current smoking status of brothers (no or yes). Additionally, current smoking status of  
155 close friends (no or yes) was considered as explanatory variable, as youths are significantly  
156 influenced by their close friends [28]. The respondent's father, brother and close friends were

157 considered as smokers if they had been cigarette/ bidi smoking for last six months prior to the  
158 survey.

## 159 **Statistical analysis**

160 After descriptive statistics of the study sample, chi-square tests were used to identify  
161 differences in the percentage of smokers by the explanatory variables (detailed above). All  
162 variables significant in chi-square tests at level  $p < 0.20$  were included in regression analysis.  
163 Finally, a binary logistic regression model was used to identify the factors that are influential  
164 in determining the smoking status of the respondents. The statistical significance of all  
165 analysis was set at  $p < 0.05$ .

## 166 **Ethical considerations**

167 The study design and funding for the project titled “Knowledge, awareness and  
168 practices among youth smokers in Trishal Upazila under Mymensingh district: A micro-  
169 survey study” were approved by the Research and Extension Center, Jatiya Kabi Kazi Nazrul  
170 Islam University, Bangladesh. All respondents were asked to provide verbal consent after  
171 being read a document emphasizing voluntary participation in the project. Any identifying  
172 information was removed. As the de-identified data for this study came from secondary  
173 source, this study does not require ethical approval.

## 174 **Results**

175 Table 1 presents the basic characteristics of the study participants. The average age is  
176 18.9 years. Among the participants, 40% are 15-17 years, 28.8% are 18-20 years, and 31.2%  
177 are 21-24 years old. Average year of schooling is 9.6, and only 12.5% of respondents are with  
178 below secondary level of education. Respondents’ fathers are with more years of education  
179 than their mothers (average year of education: father 7.3 years and mother 5.9 years).  
180 Majority of the respondents are students (67%). Although majority (66.8%) has no income,

181 the average monthly income is BDT 4,439. The average monthly income of respondent's  
182 family is BDT 22634, with around half (46%) of family's income in between BDT 15000-  
183 25000. 71.7% of respondents depend on their family for their financial supports while  
184 remaining 28.3% do not depend on their family for their financial supports. 40.3% of  
185 respondents are currently cigarette/ bidi smoking, 57.4% of the respondents' fathers are  
186 currently cigarette/ bidi smoking, 17.7% of respondents' brothers are currently cigarette/ bidi  
187 smoking, and 36.1% of the respondents' close friends are currently cigarette/ bidi smoking.  
188 Overwhelming majority of the respondents believe that smoking brings the risks of chronic  
189 diseases, and smoking is harmful to other non-smokers.

190 **<Table 1 about here>**

191 Table 2 analyzes the bivariate association between cigarette/ bidi smoking status and  
192 socio-demographics, and shows the variation in percentage of smokers by socio-  
193 demographics. A significant association between cigarette/ bidi smokers and age group was  
194 found; percentage of cigarette/ bidi smokers increase with the increase in age ( $p<0.001$ ).  
195 Respondents who are with below secondary education, day labourers, with monthly income  
196 BDT<5,000, with monthly family income BDT>25,000, financially independent from their  
197 family are more likely to smoke cigarette/ bidi than their counterparts. Respondents whose  
198 fathers, brothers and close friends are cigarette/ bidi smokers are also more likely to smoke  
199 cigarette/ bidi than the respondents whose fathers, brothers and close friends are non-  
200 smokers. Respondents who believe that smoking brings the risks of chronic diseases and is  
201 harmful to other non-smokers are less likely to smoke cigarette/ bidi than their counterparts.

202 **<Table 2 about here>**

203 Table 3 shows the results of binary logistic regression model that yields the odds of  
204 being cigarette/ bidi smokers by categories of the explanatory variables. The likelihood of  
205 being cigarette/ bidi smokers increases with the increase in age. The odds of being cigarette/

206 bidi smokers for those in age group 18-20 years is 1.78 times (95% confidence interval: 0.77-  
207 4.11) and for those in age group 21-24 years is 5.54 times (2.25-13.61) than those in age  
208 group 15-17 years. The odds of being cigarette/ bidi smokers for business owner is 0.15 times  
209 (0.03-0.69) than day labourer. Compared to respondents with no income, respondents with  
210 monthly income (either <BDT 5,000 or ≥BDT 5,000) are more likely to smoke cigarette/ bidi.  
211 Respondents coming from higher economic status (i.e. family's monthly income ≥BDT  
212 15,000) have higher odds of being cigarette/ bidi smokers than those coming from lower  
213 economic status (i.e. family's monthly income <BDT 15,000). Respondents whose fathers are  
214 cigarette/ bidi smokers are more likely to smoke cigarette/ bidi than those having non-smoker  
215 fathers; also whose brothers and close friends are cigarette/ bidi smokers are more likely to  
216 smoke cigarette/ bidi than their counterparts. Respondents who believe that smoking is  
217 harmful to other non-smokers are significantly less likely to smoke cigarette/ bidi than their  
218 counterparts.

219 <Table 3 about here>

## 220 Discussion

221 To the best of our knowledge, this is the first study that reveals the determinants of  
222 cigarette/ bidi smoking among youth male in Bangladesh. The small-scale cross-sectional  
223 data exhibit that four in 10 youth male are cigarette/ bidi smokers in Trishal Upazila of  
224 Mymensingh district. The determinants of cigarette/ bidi smoking among youth male include  
225 age, occupation, monthly income, family's monthly income, cigarette/ bidi smoking status of  
226 father, brother and close friends, and knowledge about harmfulness of smoking.

227 Higher age, particularly 21-24 years are associated with higher likelihood of cigarette/  
228 bidi smoking among youth male in the current study. Age is also found as one of the  
229 determinants of smoking among youth in Ethiopia [18,29]. This might be due to the fact that  
230 the possibility of being involved in various risky practices, particularly among youth male,



231 increases with the increase in age. Also, in Bangladesh, older youth male have some cash in  
232 their hands with which they are capable of buying cigarette/ bidi. It is particularly evident in  
233 the study area, where 69% of the respondents have some income.

234 Day labourers have the highest odds of smoking cigarette/ bidi in the current study. In  
235 the United States, blue-collar workers, specifically construction workers in the absence of  
236 their workplace rules against smoking, are more likely to be smokers than white-collar  
237 workers [30]. And, workplace smoking restrictions, mainly smoke-free policies are reported  
238 promising for reducing smokers in Canada [31]. In Bangladesh, while service holders,  
239 businessmen and students need to comply with smoking restrictions at workplaces/ schools,  
240 day labourers face almost no smoking restriction at workplaces, and unemployed youth have  
241 their limitations in expending money on smoking. No smoking restriction at workplaces  
242 could be the possible reason for the highest likelihood of being smokers among day labourers  
243 in the study area. Restricting smoking for day labourers at workplaces may reduce  
244 prospective smokers among youth male in Bangladesh.

245 There is an independent positive association of personal income with smoking among  
246 adolescents aged 14-17 years in six European countries [32]. Economic inequality has also  
247 direct correspondence with tobacco use [33]. Youth male with personal income, compared to  
248 those with no income, have higher likelihood of cigarette/ bidi smoking in the current study,  
249 which is in a line with the previous studies [34,35]. When youth have extra pocket money,  
250 they spend the money for their recreation. And, youth male, particularly with their friends,  
251 consider smoking as a pastime and therefore expend on smoking cigarette/ bidi in  
252 Bangladesh. Providing more valuable options, e.g. recreational football game to the youth  
253 would not only reduce number of smokers but also keep the youth fit and active in  
254 Bangladesh.

255 Consistent with previous literature [36], respondents coming from higher economic  
256 status have higher likelihood of smoking cigarette/ bidi in our study areas. While households  
257 with higher income are able to spend more money on their children, households with lower  
258 income struggle to manage their family expenditure. The youth from higher family income  
259 receive more pocket money than their counterparts, and may expend on smoking cigarette/  
260 bidi.

261 **Paternal smoking, specifically father's smoking** was reported to increase the risk of  
262 youth smoking [37]. The current study also finds higher likelihood of smoking cigarette/ bidi  
263 among youth male whose fathers are smokers. In a similar vein, brother's smoking is found  
264 to increase the risk of youth smoking in the study areas. Smoking among male is found to be  
265 associated with the smoking behaviour of siblings in different settings [38,39]. These findings  
266 indicate that smoking behaviour passes from one generation to another as well as within the  
267 same generation. The possible reason might be that the children who grow up by seeing their  
268 fathers and brothers smoking, those children may try to make a trail at some later points in  
269 time, and may become a regular smoker at their youth stages. Therefore, to prevent smoking  
270 among youth male in a family, the older adults– primarily fathers and male siblings of the  
271 family should stop smoking in Bangladesh.

272 Friend smoking is by far the strongest factor to increase the risk of youth smoking in  
273 different settings [18,29,37,38,40,41]. The current study also exhibits higher likelihood of  
274 smoking cigarette/ bidi among the respondents whose friends are smokers, compared those  
275 with non-smoker friends. Since this study, along with the extant literature, yields the greater  
276 peer influences on youth smoking, we suggest families to pay a great attention to their youth  
277 members to prevent them from smoking. Similar to the findings of the studies [42,43], the  
278 respondents who believe that smoking is harmful to other non-smokers are less likely to  
279 smoke cigarette/ bidi in the study areas. Awareness needs to be created through different

280 channels about deadly hazardous effects of smoking and its harmful consequences not only  
281 for the smokers and their families but also for the nation as a whole. In this regard,  
282 educational institutions and mass media may play an important role.

283 The current study has some limitations. Being a cross-sectional one, this study does  
284 not permit casual association of the explanatory variables with the outcome variable. The data  
285 come from rural areas of Trishal Upazila of Mymensingh district, and thus may not be  
286 generalizable to entire youth male in Bangladesh. Despite the limitations, as the pioneer  
287 study, it demonstrates a detailed analysis of the various socio-demographic determinants of  
288 youth smoking, which is generalizable to rural youth male of Mymensingh district in  
289 Bangladesh.

## 290 **Conclusion**

291 In sum, as the first study, it provides the determinants of cigarette/ bidi smoking  
292 among youth male of the rural areas of Mymensingh district. Based on the above discussion,  
293 **carefully planning** should be made to prevent smoking among youth, as the youth are the  
294 main instruments for future development of the country. Relevant authorities may consider  
295 the following five recommendations in formulating strong enforcement measures along with  
296 revising or redrawing the existing smoking policies to discourage smoking among the youth.  
297 The recommendations are: (i) restricting smoking for day labourers at workplaces, (ii)  
298 providing more valuable options to the youth for pastimes, e.g. recreational football game,  
299 (iii) families to pay due attention to their youth members to prevent them from smoking, (iv)  
300 the older adults of the families– primarily fathers and male siblings stop smoking, and (v)  
301 educational institutions and mass media create awareness about the hazardous effects and  
302 harmful consequences of smoking not only for the smokers and their families but also for the  
303 entire country.

304

## 305 **Acknowledgements**

306 The authors gratefully acknowledge the Research and Extension Center, Jatiya Kabi Kazi  
307 Nazrul Islam University, Bangladesh, for providing the scope to conduct this study.

## 308 **Funding**

309 The authors received no specific funding for this work.

## 310 **Conflict of interest**

311 The author(s) declare no potential conflicts of interest with respect to the research,  
312 authorship, and/ or publication of this article.

313

## 314 **References**

- 315 1. World Health Organization. Tobacco. 2020 [cited 10 Aug 2020]. Available:  
316 <https://www.who.int/news-room/fact-sheets/detail/tobacco>
- 317 2. World Health Organization. WHO | Bangladesh – National tobacco control law  
318 amended. In: WHO [Internet]. World Health Organization; 2013 [cited 7 Aug 2020].  
319 Available: [http://www.who.int/fctc/implementation/news/news\\_ban/en/](http://www.who.int/fctc/implementation/news/news_ban/en/)
- 320 3. Hossain S, Hossain S, Ahmed F, Islam R, Sikder T, Rahman A. Prevalence of tobacco  
321 smoking and factors associated with the initiation of smoking among university students  
322 in Dhaka, Bangladesh. *Central Asian journal of global health*. 2017;6.
- 323 4. Eurobarometer S. Attitudes of Europeans towards tobacco and electronic cigarettes.  
324 TNS Opinion Social. 2015;429.
- 325 5. Giovino GA. Epidemiology of tobacco use in the United States. *Oncogene*. 2002;21:  
326 7326–7340.

- 327 6. Johnston LD, Miech RA, O'Malley PM, Bachman JG, Schulenberg JE, Patrick ME.  
328 Monitoring the Future National Survey Results on Drug Use, 1975-2018: Overview,  
329 Key Findings on Adolescent Drug Use. Institute for Social Research. 2019.
- 330 7. Al-Kubaisy W, Abdullah NN, Al-Nuaimy H, Kahn SM, Halawany G, Kurdy S. Factors  
331 associated with smoking behaviour among university students in Syria. *Procedia-Social  
332 and Behavioral Sciences*. 2012;38: 59–65.
- 333 8. CDC Tobacco Free. Health Effects of Cigarette Smoking. In: Centers for Disease  
334 Control and Prevention [Internet]. 2019 [cited 10 Aug 2020]. Available:  
335 [https://www.cdc.gov/tobacco/data\\_statistics/fact\\_sheets/health\\_effects/effects\\_cig\\_smo  
336 king/index.htm](https://www.cdc.gov/tobacco/data_statistics/fact_sheets/health_effects/effects_cig_smoking/index.htm)
- 337 9. Ullah SMA, Rahman KMM, Islam MT. Development of Selected Sectors under  
338 Democratic Governments in Bangladesh: A Comparative Analysis. *KILA Journal of  
339 Local Governance*. 2018;5: 21–28.
- 340 10. World Health Organization. The World Health Report 1999-making a difference.  
341 Chapter 5-Combating the tobacco epidemic. World Health Organization; 1999 pp. 65–  
342 69. Available: [https://www.who.int/whr/1999/en/whr99\\_ch5\\_en.pdf?ua=1](https://www.who.int/whr/1999/en/whr99_ch5_en.pdf?ua=1)
- 343 11. World Health Organization. Global adult tobacco survey: Bangladesh Report 2009.  
344 2009.
- 345 12. Kamimura A, Ahmmad Z, Pye M, Gull B. Peer smoking and smoking-related beliefs  
346 among college students in Bangladesh. *Journal of Preventive Medicine and Public  
347 Health*. 2018;51: 51.
- 348 13. Bandason T, Rusakaniko S. Prevalence and associated factors of smoking among  
349 secondary school students in Harare Zimbabwe. *Tobacco Induced Diseases*. 2010;8: 12.
- 350 14. Escario JJ, Wilkinson AV. Visibility of smoking among schoolteachers in Spain and  
351 associations with student smoking: a cross-sectional study. *BMJ open*. 2018;8.

- 352 15. Doku D, Koivusilta L, Raisamo S, Rimpelä A. Do socioeconomic differences in tobacco  
353 use exist also in developing countries? A study of Ghanaian adolescents. *BMC Public*  
354 *Health*. 2010;10: 758.
- 355 16. Nguyen CV. Demographic and socio-economic determinants of smoking behavior:  
356 evidence from Vietnam. *Economics Bulletin*. 2012;32: 2300–2312.
- 357 17. Nketiah-Amponsah E, Afful-Mensah G, Ampaw S. Determinants of cigarette smoking  
358 and smoking intensity among adult males in Ghana. *BMC public health*. 2018;18: 941.
- 359 18. Reda AA, Moges A, Yazew B, Biadgilign S. Determinants of cigarette smoking among  
360 school adolescents in eastern Ethiopia: a cross-sectional study. *Harm reduction journal*.  
361 2012;9: 39.
- 362 19. Smet B, Maes L, De Clercq L, Haryanti K, Winarno RD. Determinants of smoking  
363 behaviour among adolescents in Semarang, Indonesia. *Tobacco control*. 1999;8: 186–  
364 191.
- 365 20. Van Loon AJM, Tjhuis M, Surtees PG, Ormel J. Determinants of smoking status:  
366 cross-sectional data on smoking initiation and cessation. *The European Journal of Public*  
367 *Health*. 2005;15: 256–261.
- 368 21. United Nations. Secretary General’s Report to the General Assembly,(A/36/215).  
369 United Nations New York, NY; 1981.
- 370 22. Bangladesh Bureau of Statistics. Bangladesh Population and Housing Census 2011; Zila  
371 Report: Mymensingh. Statistics and Informatics Division (SID), Ministry of Planning,  
372 Governments of the People’s Republic of Bangladesh; 2015. Available:  
373 [http://203.112.218.65:8008/WebTestApplication/userfiles/Image/PopCenZilz2011/Zila\\_](http://203.112.218.65:8008/WebTestApplication/userfiles/Image/PopCenZilz2011/Zila_)  
374 [Mymensingh.pdf](http://203.112.218.65:8008/WebTestApplication/userfiles/Image/PopCenZilz2011/Zila_Mymensingh.pdf)

- 375 23. Chhakchhuak L, Hriatpuii L, Chhakchhuak L. Socio-economic status as predictors of  
376 initiation and persistence of youth smoking in Mizoram. *Tobacco Induced Diseases*.  
377 2018;16: pp. 367–367.
- 378 24. Fernandez E, Garcia M, Schiaffino A, Borrás JM, Nebot M, Segura A. Smoking  
379 initiation and cessation by gender and educational level in Catalonia, Spain. *Preventive*  
380 *medicine*. 2001;32: 218–223.
- 381 25. Linetzky B, Mejia R, Ferrante D, De Maio FG, Diez Roux AV. Socioeconomic status  
382 and tobacco consumption among adolescents: a multilevel analysis of Argentina’s  
383 Global Youth Tobacco Survey. *Nicotine & Tobacco Research*. 2012;14: 1092–1099.
- 384 26. Mejía RM, Linetzky B, Diez Roux A, Ferrante D, De Maio F. Socioeconomic status and  
385 tobacco consumption among adolescents: a multilevel analysis of Argentina’s global  
386 youth tobacco survey. 2012.
- 387 27. Sakore DN, Parande MA, Tapare VS, Bhattacharya S. Knowledge, attitude and practice  
388 of tobacco consumption among male college students of a rural area of Pune,  
389 Maharashtra. *International Journal of Community Medicine and Public Health*. 2017;4:  
390 3455.
- 391 28. Huang GC, Unger JB, Soto D, Fujimoto K, Pentz MA, Jordan-Marsh M, et al. Peer  
392 Influences: The Impact of Online and Offline Friendship Networks on Adolescent  
393 Smoking and Alcohol Use. *Journal of Adolescent Health*. 2014;54: 508–514.  
394 doi:10.1016/j.jadohealth.2013.07.001
- 395 29. Duko B, Melese Y, Ebrahim J. Determinants of cigarette smoking among adolescents in  
396 Ethiopia: A cross-sectional study. *Tobacco induced diseases*. 2019;17.
- 397 30. Ham DC, Przybeck T, Strickland JR, Luke DA, Bierut LJ, Evanoff BA. Occupation and  
398 workplace policies predict smoking behaviors: analysis of national data from the current

- 399 population survey. *Journal of occupational and environmental medicine/American*  
400 *College of Occupational and Environmental Medicine*. 2011;53: 1337.
- 401 31. Shields M. Smoking bans: influence on smoking prevalence. *Health Reports*. 2007;18:  
402 9.
- 403 32. Perelman J, Alves J, Pfoertner T-K, Moor I, Federico B, Kuipers MA, et al. The  
404 association between personal income and smoking among adolescents: a study in six  
405 European cities. *Addiction*. 2017;112: 2248–2256.
- 406 33. Nargis N, Thompson ME, Fong GT, Driezen P, Hussain AG, Ruthbah UH, et al.  
407 Prevalence and patterns of tobacco use in Bangladesh from 2009 to 2012: evidence from  
408 International Tobacco Control (ITC) Study. *PloS one*. 2015;10: e0141135.
- 409 34. Lalithambigai G, Rao A, Rajesh G, Shenoy R, Pai MB. Predictors of cigarette smoking  
410 among young adults in Mangalore, India. *Asian Pacific Journal of Cancer Prevention*.  
411 2016;17: 45–50.
- 412 35. Pradhan PMS, Niraula SR, Ghimire A, Singh SB, Pokharel PK. Tobacco use and  
413 associated factors among adolescent students in Dharan, Eastern Nepal: a cross-  
414 sectional questionnaire survey. *BMJ open*. 2013;3.
- 415 36. Abou-Faddan HH, Ahmed SM. Knowledge, Attitude and Practice Study on Smoking  
416 among Male Students in Al-Jabal Al-Gharbi University, Gharian–Libya. *Journal of*  
417 *American Science*. 2012;8: 485–491.
- 418 37. Stanton CA, Papandonatos G, Lloyd-Richardson EE, Kazura A, Shiu S-Y, Niaura R.  
419 How do mothers, fathers, and friends influence stages of adolescent smoking?  
420 *Adolescent & family health: A & FH*. 2009;4: 95.
- 421 38. Saari AJ, Kentala J, Mattila KJ. The smoking habit of a close friend or family  
422 member—how deep is the impact? A cross-sectional study. *BMJ open*. 2014;4.



- 423 39. Vink JM, Willemsen G, Engels RC, Boomsma DI. Smoking status of parents, siblings  
424 and friends: predictors of regular smoking? Findings from a longitudinal twin-family  
425 study. *Twin Research and Human Genetics*. 2003;6: 209–217.
- 426 40. Hassan MS, Hossain MK, Khan HT. Prevalence and predictors of tobacco smoking  
427 among university students in Sylhet Division, Bangladesh. *International health*.  
428 2019;11: 306–313.
- 429 41. Kumar V, Talwar R, Roy N, Raut D, Singh S. Psychosocial determinants of tobacco use  
430 among school going adolescents in Delhi, India. *Journal of addiction*. 2014;2014.
- 431 42. Abughosh S, Wu IH, Hawari F, Peters RJ, Yang M, Crutchley R. Predictors of intention  
432 to quit cigarette smoking among Jordanian adults. *Epidemiology*. 2011;1: 1–7.
- 433 43. Dawood OT, Rashan MAA, Hassali MA, Saleem F. Knowledge and perception about  
434 health risks of cigarette smoking among Iraqi smokers. *Journal of pharmacy & bioallied  
435 sciences*. 2016;8: 146.
- 436 44. Semmer NK, Cleary PD, Dwyer JH, Fuchs R, Lippert P. Chapter 1: Psychosocial  
437 Predictors of Adolescent Smoking in Two German Cities: The Berlin-Bremen Study.  
438 *Morbidity and mortality weekly report*. 1987;36: 3S-10S.
- 439 45. Stronks K, van de Mheen HD, Looman CW, Mackenbach JP. Cultural, material, and  
440 psychosocial correlates of the socioeconomic gradient in smoking behavior among  
441 adults. *Preventive medicine*. 1997;26: 754–766.
- 442
- 443

444 **Table 1: Basic characteristics of the respondents**

445

| <b>Variables</b>                                | <b>Frequency</b>       | <b>Percent</b> |
|-------------------------------------------------|------------------------|----------------|
| <b>Age group</b>                                |                        |                |
| 15-17                                           | 154                    | 40.0           |
| 18-20                                           | 111                    | 28.8           |
| 21-24                                           | 120                    | 31.2           |
| <b>Average age (SD)</b>                         | <b>18.9 (3.1)</b>      |                |
| <b>Education</b>                                |                        |                |
| Below secondary                                 | 48                     | 12.5           |
| Secondary                                       | 197                    | 51.1           |
| Higher secondary and above                      | 140                    | 36.4           |
| <b>Average year of schooling (SD)</b>           | <b>9.6 (3.3)</b>       |                |
| <b>Education of father</b>                      |                        |                |
| Below secondary                                 | 169                    | 43.8           |
| Secondary                                       | 108                    | 28.1           |
| Higher secondary and above                      | 108                    | 28.1           |
| <b>Average year of schooling of father (SD)</b> | <b>7.3 (5.4)</b>       |                |
| <b>Education of mother</b>                      |                        |                |
| Below secondary                                 | 207                    | 53.8           |
| Secondary                                       | 125                    | 32.4           |
| Higher secondary and above                      | 53                     | 13.8           |
| <b>Average year of schooling of mother (SD)</b> | <b>5.9 (4.7)</b>       |                |
| <b>Occupation</b>                               |                        |                |
| Day labourer                                    | 20                     | 5.2            |
| Service                                         | 20                     | 5.2            |
| Business                                        | 65                     | 16.9           |
| Students                                        | 258                    | 67.0           |
| Unemployed                                      | 22                     | 5.7            |
| <b>Monthly income (in BDT)</b>                  |                        |                |
| No income                                       | 257                    | 66.8           |
| < 5000                                          | 21                     | 5.5            |
| ≥5000                                           | 107                    | 27.7           |
| <b>Average income (SD)</b>                      | <b>4439 (7877.8)</b>   |                |
| <b>Family's monthly income (in BDT)</b>         |                        |                |
| < 15000                                         | 97                     | 25.2           |
| 15000-25000                                     | 177                    | 46.0           |
| > 25000                                         | 111                    | 28.8           |
| <b>Average monthly income of family (SD)</b>    | <b>22634 (12958.1)</b> |                |
| <b>Financially dependent on the family</b>      |                        |                |
| Dependent                                       | 276                    | 71.7           |
| Independent                                     | 109                    | 28.3           |
| <b>Current smoking status</b>                   |                        |                |
| No                                              | 230                    | 59.7           |
| Yes                                             | 155                    | 40.3           |
| <b>Current smoking status of father*</b>        |                        |                |
| No                                              | 164                    | 42.6           |
| Yes                                             | 221                    | 57.4           |
| <b>Current smoking status of brother</b>        |                        |                |

|                                                     |     |      |
|-----------------------------------------------------|-----|------|
| No                                                  | 317 | 82.3 |
| Yes                                                 | 68  | 17.7 |
| <b>Current smoking status of close friend</b>       |     |      |
| No                                                  | 246 | 63.9 |
| Yes                                                 | 139 | 36.1 |
| <b>Smoking brings the risks of chronic diseases</b> |     |      |
| No                                                  | 6   | 1.6  |
| Yes                                                 | 379 | 98.4 |
| <b>Smoking is harmful to other non-smokers</b>      |     |      |
| No                                                  | 14  | 3.6  |
| Yes                                                 | 371 | 96.4 |

446

447

448

449

450

**Notes:** BDT: Bangladesh currency – Taka; SD indicates Standard Deviation; \* No mother of the study participants found as smoker.

451  
452

**Table 2: Percentage of smokers by socio-demographics**

| Variables                                  | Smoker |                |
|--------------------------------------------|--------|----------------|
|                                            | Number | Row percentage |
| <b>Age group</b>                           |        |                |
| 15-17                                      | 30     | 19.5           |
| 18-20                                      | 45     | 40.5           |
| 21-24                                      | 80     | 66.7           |
| <i>p-value</i>                             | <0.001 |                |
| <b>Education</b>                           |        |                |
| Below secondary                            | 28     | 58.3           |
| Secondary                                  | 53     | 26.9           |
| Higher secondary and above                 | 74     | 52.9           |
| <i>p-value</i>                             | <0.001 |                |
| <b>Education of father</b>                 |        |                |
| Below secondary                            | 65     | 38.5           |
| Secondary                                  | 42     | 38.9           |
| Higher secondary and above                 | 48     | 44.4           |
| <i>p-value</i>                             | 0.57   |                |
| <b>Education of mother</b>                 |        |                |
| Below secondary                            | 77     | 37.2           |
| Secondary                                  | 54     | 43.2           |
| Higher secondary and above                 | 24     | 45.3           |
| <i>p-value</i>                             | 0.40   |                |
| <b>Occupation</b>                          |        |                |
| Day labourer                               | 16     | 80.0           |
| Service                                    | 12     | 60.0           |
| Business                                   | 34     | 52.3           |
| Students                                   | 83     | 32.2           |
| Unemployed                                 | 10     | 45.5           |
| <i>p-value</i>                             | <0.001 |                |
| <b>Monthly income (in BDT)</b>             |        |                |
| No income                                  | 79     | 30.7           |
| < 5000                                     | 13     | 61.9           |
| ≥5000                                      | 63     | 58.9           |
| <i>p-value</i>                             | <0.001 |                |
| <b>Family's monthly income (in BDT)</b>    |        |                |
| < 15000                                    | 26     | 26.8           |
| 15000-25000                                | 75     | 42.4           |
| > 25000                                    | 54     | 48.6           |
| <i>p-value</i>                             | <0.001 |                |
| <b>Financially dependent on the family</b> |        |                |
| Dependent                                  | 93     | 33.7           |
| Independent                                | 62     | 56.9           |
| <i>p-value</i>                             | <0.001 |                |
| <b>Current smoking status of father</b>    |        |                |
| No                                         | 55     | 33.5           |
| Yes                                        | 100    | 45.2           |
| <i>p-value</i>                             | 0.02   |                |

|                                                   |        |      |
|---------------------------------------------------|--------|------|
| <b>Current smoking status of brother</b>          |        |      |
| No                                                | 114    | 36.0 |
| Yes                                               | 41     | 60.3 |
| <i>p-value</i>                                    | <0.001 |      |
| <b>Current smoking status of close friends</b>    |        |      |
| No                                                | 54     | 22.0 |
| Yes                                               | 101    | 72.7 |
| <i>p-value</i>                                    | <0.001 |      |
| <b>Smoking brings the risk of chronic disease</b> |        |      |
| No                                                | 5      | 83.3 |
| Yes                                               | 150    | 39.6 |
| <i>p-value</i>                                    | 0.03   |      |
| <b>Smoking is harmful to other non-smokers</b>    |        |      |
| No                                                | 11     | 78.6 |
| Yes                                               | 144    | 38.8 |
| <i>p-value</i>                                    | <0.001 |      |

453

454 **Notes:** BDT: Bangladesh currency – Taka. The p-values are of chi-square tests.

455  
456

**Table 3: Association of socio-demographics with smoking status**

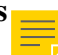

| <b>Variables</b>                                  | <b>Odds Ratio</b> | <b>95% confidence interval</b> |
|---------------------------------------------------|-------------------|--------------------------------|
| <b>Age group</b>                                  |                   |                                |
| 15-17®                                            | 1.00              | -                              |
| 18-20                                             | 1.78              | 0.77 – 4.11                    |
| 21-24                                             | 5.54***           | 2.25 – 13.61                   |
| <b>Education</b>                                  |                   |                                |
| Below secondary®                                  | 1.00              | -                              |
| Secondary                                         | 0.44              | 0.16 – 1.19                    |
| Higher secondary and above                        | 0.51              | 0.17 – 1.53                    |
| <b>Occupation</b>                                 |                   |                                |
| Day labourer®                                     | 1.00              | -                              |
| Service                                           | 0.40              | 0.06 – 2.54                    |
| Business                                          | 0.15**            | 0.03 – 0.69                    |
| Students                                          | 0.42              | 0.07 – 2.49                    |
| Unemployed                                        | 0.20              | 0.03 – 1.28                    |
| <b>Monthly income (in BDT)</b>                    |                   |                                |
| No income®                                        | 1.00              | -                              |
| < 5000                                            | 4.92***           | 1.87 – 12.59                   |
| ≥5000                                             | 3.11              | 0.56 – 7.27                    |
| <b>Family's monthly income (in BDT)</b>           |                   |                                |
| < 15000®                                          | 1.00              | -                              |
| 15000-25000                                       | 2.09*             | 1.01 – 4.34                    |
| > 25000                                           | 2.77**            | 1.24 – 6.18                    |
| <b>Financially dependent on the family</b>        |                   |                                |
| Dependent®                                        | 1.00              | -                              |
| Independent                                       | 2.62              | 0.59 – 7.52                    |
| <b>Current smoking status of father</b>           |                   |                                |
| No®                                               | 1.00              | -                              |
| Yes                                               | 2.24***           | 1.25 – 3.98                    |
| <b>Current smoking status of brother</b>          |                   |                                |
| No®                                               | 1.00              | -                              |
| Yes                                               | 3.03***           | 1.46 – 6.29                    |
| <b>Current smoking status of close friend</b>     |                   |                                |
| No®                                               | 1.00              | -                              |
| Yes                                               | 10.65***          | 5.89 – 19.25                   |
| <b>Smoking brings the risk of chronic disease</b> |                   |                                |
| No®                                               | 1.00              | -                              |
| Yes                                               | 0.15              | 0.01 – 2.54                    |
| <b>Smoking is harmful to other non-smokers</b>    |                   |                                |
| No®                                               | 1.00              | -                              |
| Yes                                               | 0.13**            | 0.03 – 0.70                    |

457  
458  
459

**Notes:** BDT: Bangladesh currency – Taka; ®: Reference Category; Level of significance: \*\*\*: p<0.001; \*\*: p<0.01; \*: p<0.05.
